# Supplementary material for: Changes in Physical Activity and Sedentary Behaviour in Cardiovascular Disease Patients during the COVID-19 Lockdown
Source: Int J Environ Res Public Health. 2021 Nov 13;18(22):11929. doi: 10.3390/ijerph182211929 (PMC8623455; doi:10.3390/ijerph182211929)
Supplement: Supplementary file 1 [file ijerph-18-11929-s001.zip › ijerph-1431611-supplementary.pdf]

Changes in Physical Activity and Sedentary Behaviour in Cardiovascular Disease Patients during the COVID-19 Lockdown.

## Supplemental Tables

**Table S1.** Baseline characteristics.

| Baseline characteristics                         | <i>n</i> = 1,565 | Missing values |
|--------------------------------------------------|------------------|----------------|
| <b>Age (years)</b>                               | 67 [60, 73]      | 0 (0%)         |
| <b>Sex (male)</b>                                | 1144 (73%)       | 0 (0%)         |
| <b>CVD subtype</b>                               |                  | 0 (0%)         |
| Myocardial infarction                            | 754 (48%)        |                |
| Angina pectoris                                  | 284 (18%)        |                |
| Heart valve disease                              | 139 (9%)         |                |
| Heart failure                                    | 119 (8%)         |                |
| Other*                                           | 269 (17%)        |                |
| <b>Lockdown adherence (0-10)</b>                 | 9 [8, 10]        | 4 (0.3%)       |
| <b>Extent of being impeded by:</b>               |                  |                |
| Lack of social contact                           |                  | 68 (4%)        |
| Low                                              | 438 (29%)        |                |
| Moderate                                         | 168 (11%)        |                |
| High                                             | 891 (60%)        |                |
| Fear of a COVID-19 infection                     |                  | 18 (1%)        |
| Low                                              | 560 (36%)        |                |
| Moderate                                         | 273 (18%)        |                |
| High                                             | 714 (46%)        |                |
| Limited possibilities for physical activity      |                  | 22 (1%)        |
| Low                                              | 728 (47%)        |                |
| Moderate                                         | 174 (11%)        |                |
| High                                             | 641 (42%)        |                |
| Stress due to financial consequences of COVID-19 |                  | 2 (0.1%)       |
| Low                                              | 955 (61%)        |                |
| Moderate                                         | 300 (19%)        |                |
| High                                             | 308 (20%)        |                |

\*Other was defined as heart rhythm disorders, congenital heart disease, stroke and peripheral artery disease. Data were reported as n (%) or median [interquartile range]. COVID-19, coronavirus disease 2019; CVD, cardiovascular disease.

**Table S2.** Extent of being impeded by mental health factors during follow-up.

| Extent of being impeded in by:                          | May (Q2)  | June (Q3) | July (Q4) |
|---------------------------------------------------------|-----------|-----------|-----------|
| <b>Lack of social contact</b>                           |           |           |           |
| Low                                                     | 315 (33%) | 350 (40%) | 398 (48%) |
| Moderate                                                | 88 (9%)   | 111 (13%) | 109 (13%) |
| High                                                    | 553 (58%) | 419 (48%) | 328 (39%) |
| <b>Fear of a COVID-19 infection</b>                     |           |           |           |
| Low                                                     | 405 (41%) | 425 (47%) | 417 (49%) |
| Moderate                                                | 157 (16%) | 147 (16%) | 161 (19%) |
| High                                                    | 430 (43%) | 332 (37%) | 282 (33%) |
| <b>Limited possibilities for physical activity</b>      |           |           |           |
| Low                                                     | 475 (49%) | 480 (54%) | 474 (57%) |
| Moderate                                                | 96 (10%)  | 98 (11%)  | 100 (12%) |
| High                                                    | 396 (41%) | 311 (35%) | 262 (31%) |
| <b>Stress due to financial consequences of COVID-19</b> |           |           |           |
| Low                                                     | 655 (66%) | 626 (69%) | 620 (72%) |
| Moderate                                                | 167 (17%) | 152 (17%) | 129 (15%) |
| High                                                    | 174 (18%) | 136 (15%) | 118 (14%) |

**Table S3.** Changes in moderate-to-vigorous physical activity (MVPA) and sedentary time during the first-wave COVID-19 lockdown period\*.

|                                       | April (Q1)           | May (Q2)           |       | June (Q3)          |        | July (Q4)         |        |
|---------------------------------------|----------------------|--------------------|-------|--------------------|--------|-------------------|--------|
| Moderate-vigorous physical activity   | Estimate (95% CI)    | Δ (95% CI)         | P     | Δ (95% CI)         | P      | Δ (95% CI)        | P      |
| <b>Total MVPA (min/day)</b>           | 174.2 (165.7; 182.6) | +7.2 (-1.9; 16.2)  | 0.12  | +7.4 (-2.0; 16.8)  | 0.12   | +2.9 (-6.6; 12.5) | 0.55   |
| Leisure-time                          | 152.1 (32.3; 271.9)  | +8.1 (-0.1; 16.3)  | 0.05  | +8.2 (-0.3; 16.6)  | 0.06   | +3.8 (-4.8; 12.5) | 0.38   |
| Doing odd jobs                        | 51.9 (47.4; 56.4)    | 0.1 (-4.7; 4.8)    | 0.98  | -2.9 (-7.8; 2.0)   | 0.25   | -2.8 (-7.8; 2.3)  | 0.28   |
| Walking                               | 38.7 (35.7; 41.8)    | +1.3 (-2.0; 4.5)   | 0.44  | +0.9 (-2.5; 4.2)   | 0.60   | -0.6 (-4.0; 2.8)  | 0.73   |
| Cycling                               | 30.2 (-136.4; 196.8) | +2.2 (-0.7; 5.0)   | 0.14  | +3.9 (0.9; 6.8)    | 0.011  | +2.7 (-0.3; 5.7)  | 0.08   |
| Gardening                             | 19.2 (16.9; 21.6)    | +2.3 (-0.3; 4.8)   | 0.09  | +2.3 (-0.3; 4.9)   | 0.09   | +0.8 (-1.9; 3.5)  | 0.56   |
| Exercise                              | 12.1 (-58.0; 82.1)   | +2.4 (0.4; 4.4)    | 0.021 | +4.0 (1.9; 6.1)    | <0.001 | +3.7 (1.6; 5.8)   | 0.001  |
| Household                             | 9.4 (-0.4; 19.3)     | +0.4 (-1.1; 1.9)   | 0.59  | +0.6 (-0.9; 2.2)   | 0.43   | +0.2 (-1.4; 1.9)  | 0.76   |
| Work                                  | 10.8 (-53.5; 75.1)   | -1.1 (-4.0; 1.9)   | 0.48  | -1.2 (-4.2; 1.9)   | 0.44   | -1.5 (-4.7; 1.6)  | 0.33   |
| Transportation                        | 1.9 (1.1; 2.6)       | -0.2 (-1.0; 0.5)   | 0.54  | -0.2 (-1.0; 0.6)   | 0.64   | +0.4 (-0.4; 1.2)  | 0.35   |
| <b>Sedentary time</b>                 | Estimate (95% CI)    | Δ (95% CI)         | P     | Δ (95% CI)         | P      | Δ (95% CI)        | P      |
| <b>Total sedentary time (min/day)</b> | 672.7 (621.0; 724.4) | +10.0 (-8.7; 28.7) | 0.29  | +19.7 (0.4; 39.0)  | 0.045  | +25.2 (5.4; 47.1) | 0.013  |
| Leisure-time                          | 216.6 (168.4; 264.9) | +8.4 (-8.7; 25.6)  | 0.33  | +17.9 (0.26; 35.6) | 0.047  | +22.3 (4.2; 40.4) | 0.016  |
| Watching television                   | 117.2 (19.5; 215.0)  | +1.9 (-5.3; 9.1)   | 0.61  | +0.1 (-7.4; 7.5)   | 0.99   | -1.3 (-8.9; 6.3)  | 0.74   |
| Using tablet/PC                       | 76.5 (59.9; 93.1)    | +1.2 (-4.8; 7.2)   | 0.70  | +4.8 (-1.4; 11.0)  | 0.13   | +5.4 (-1.0; 11.7) | 0.10   |
| Eating and drinking                   | 42.7 (-73.9; 159.2)  | +2.1 (-3.2; 7.4)   | 0.44  | +4.2 (-1.3; 9.6)   | 0.14   | +6.4 (0.8; 12.0)  | 0.026  |
| Reading                               | -66.1 (-167.8; 35.6) | +3.3 (-1.3; 7.8)   | 0.16  | +8.4 (3.7; 13.1)   | <0.001 | +9.9 (5.1; 14.8)  | <0.001 |
| Listening to music                    | 20.2 (-179.8; 220.2) | -0.3 (-7.3; 6.8)   | 0.94  | -0.1 (-7.4; 7.1)   | 0.97   | -0.7 (-8.1; 6.8)  | 0.86   |
| Doing arts and crafts                 | 18.2 (8.3; 28.1)     | +0.6 (-2.6; 3.8)   | 0.70  | 0.5 (-2.8; 3.8)    | 0.77   | 1.2 (-2.2; 4.6)   | 0.48   |
| Talking on the phone                  | 8.9 (-8.2; 26.0)     | -1.0 (-3.0; 1.1)   | 0.35  | -0.4 (-2.5; 1.7)   | 0.68   | +0.8 (-1.4; 2.9)  | 0.49   |
| Deskwork                              | 404.9 (381.2; 428.7) | +0.3 (-8.3; 8.9)   | 0.94  | -0.6 (-9.4; 8.3)   | 0.90   | -0.7 (-9.7; 8.4)  | 0.88   |
| Transportation by car, bus or train   | 51.3 (-22.1; 124.6)  | +1.2 (-2.3; 4.6)   | 0.51  | +2.3 (-1.3; 5.9)   | 0.21   | +3.5 (-0.2; 7.2)  | 0.06   |

\*Data were reported as estimate (95% confidence interval (CI)) for baseline (Q1) measurements and Δ (95% CI) for follow-up measurements (Q2, Q3, Q4). Values were based on final multivariate mixed model analysis, adjusted for confounding factors with baseline (Q1) as reference category.
